# Supplementary material for: One-step hydrothermal synthesis of silver nanoparticles loaded on N-doped carbon and application for catalytic reduction of 4-nitrophenol
Source: Royal Society of Chemistry journal article supplement (doi:10.1039/c5ra07589k), 2015-01-01
Supplement: c5ra07589k1.pdf [file c5ra07589k1.pdf]

Fig. S1.  $A_t/A_0$  versus reaction time for the reduction of 4-NP solution over NC, S1, S2,S3 and S4.

Fig. S2. High-resolution XPS spectra of N 1s over S1, S2,S3 and S4.
